# Supplementary material for: Genes associated with translation and oxidative phosphorylation as components of the translational response in nodulated and water-restricted soybean
Source: Research Square preprint supplement (doi:10.21203/rs.3.rs-7686372/v1), 2025-10-13
Supplement: Supplementary file 1 [file 75f71eaf6cb2b50452ceb762.xlsx]

## Sheet: Suppl.Table_1
Table S1. Descriptive statistics of sequencing data processing for each biological replicate and its corresponding RNA fraction (TOTAL and PAR).
Sample	# PE reads	# kept PE reads	% discarded reads	Mapping rate (%) sin rRNA
26_PAR	24653064	23705724	3.84	46.76
26_TOTAL	24718265	23911783	3.26	92.74
28_PAR	29472901	28450341	3.47	54.09
28_TOTAL	27897774	27032943	3.1	90.79
29_PAR	21731838	20478608	5.77	93.01
29_TOTAL	31553305	29413819	6.78	90.13
21_PAR	24698171	23831711	3.51	40.99
21_TOTAL	23861620	23190883	2.81	92.02
22_PAR	21389089	20551342	3.92	41.46
22_TOTAL	24346013	23323586	4.2	91.52
24_PAR	23903868	23002868	3.77	28.62
24_TOTAL	22633413	21748412	3.91	88.31
36_PAR	31552221	30112902	4.56	88.41
36_TOTAL	31556167	30146963	4.47	93.44
38_PAR	20975297	20114247	4.11	34.58
38_TOTAL	26705209	25876982	3.1	91.38
40_PAR	20207273	19569084	3.16	94.05
40_TOTAL	23536085	22833397	2.99	93.26
31_PAR	21921840	21120617	3.65	32.56
31_TOTAL	28724521	27835677	3.09	92.44
32_PAR	22394571	21051722	6	92.08
32_TOTAL	21753412	20264985	6.84	88.16
35_PAR	22617433	21809961	3.57	39.34
35_TOTAL	21810738	21114180	3.19	93.19
#: number. PE: paired-end. # kept reads: after processing via Trimmomatic (versión 0.39, Bolger et al. 2014). Mapping against reference transcriptome depleted of rRNA (GCF_000004515.6, Glycine max v4.0, without rRNA).

## Sheet: Suppl.Table_2
Table S2. Weighted gene co-expression network analysis (WGCNA) with co-localized Differentially Expressed Genes (DEGs) common to contrasts i) and iii) and contrasts ii) and iv) at the TOTAL, PAR, or TOTAL+PAR level.
Contrasts	Status	Regulation level	M0	M1	M2	M3	M4	M5	M6	M7	M8	M9	M10	M11	M12	M13	M14	M15	M16	M17	M18	M19	M20	M21	M22	M23	M24	M25	M26	M27	M28	M29	M30	M31	M32	M33
i) N+WR vs N+WW and iii) NN+WR vs NN+WW	Downregulated	TOTAL	0	0	0	0	17	0	0	7	2	0	0	0	0	0	0	0	0	0	1	0	0	0	0	8 (5)	0	0	1	0	0	0	0	2	0	0
		PAR	0	0	0	0	5 (1)	0	0	3	1	0	0	0	0	0	0	0	0	0	0	0	0	0	1	1	0	0	0	0	0	0	0	0	0	0
		TOTAL+PAR	0	0	0	0	144 (84)	0	0	50 (21)	4 (2)	0	0	0	0	0	0	0	0	0	1	0	1	1	1	0	0	0	0	1	0	0	0	2 (1)	1	0
	Upregulated	TOTAL	0	0	0	0	6	0	0	0	0	0	0	0	0	0	0	0	0	0	0	0	0	0	0	0	0	0	0	0	0	0	0	0	0	0
		PAR	0	1	0	0	1	0	0	0	1	0	0	0	0	0	0	0	0	0	0	0	0	0	0	0	0	0	0	0	0	0	0	0	0	0
		TOTAL+PAR	0	0	0	0	34 (14)	0	0	1	16 (7)	0	0	0	0	0	0	0	0	0	0	0	0	0	0	0	1	0	0	0	0	0	0	0	0	0
ii) N+WR vs NN+WR and iv) N+WW vs NN+WW	Downregulated	TOTAL	0	0	0	0	2 (1)	0	1	2	0	0	2	0	0	0	0	2	0	0	0	0	0	0	0	1 (1)	0	0	0	0	0	0	0	0	0	0
		PAR	0	0	0	0	0	0	0	0	0	0	1	0	0	0	0	0	0	0	0	0	0	0	0	0	0	0	0	0	0	0	0	0	0	0
		TOTAL+PAR	0	0	0	0	4 (4)	0	0	9 (4)	0	0	5	0	0	0	0	3	0	0	0	0	0	0	0	0	0	0	0	0	0	0	0	0	0	0
	Upregulated	TOTAL	0	0	0	0	2	0	0	1	1	0	6 (1)	0	0	0	0	0	0	0	0	8 (1)	0	0	0	3	0	0	0	0	0	1	0	0	0	0
		PAR	0	0	0	0	0	0	0	0	0	0	1	0	0	0	0	0	0	0	0	0	0	0	0	0	0	0	0	0	0	0	0	0	0	0
		TOTAL+PAR	0	0	0	0	1	0	0	0	0	0	113 (63)	0	0	0	0	0	0	0	0	3	0	0	0	0	0	0	0	0	0	0	0	0	0	0
All 34 modules (M) are depicted, as well as their status (up- or down- regulated). The number of DEGs that are also modules’ hub genes is indicated in parentheses.

## Sheet: Suppl.Table_3
Table S3. Number of Differentially Expressed Genes (DEGs) co-localized within the 33 Modules (M) of the Weighted Gene Co-expression Network Analysis (WGCNA) across the four contrasts analyzed (i, ii, iii, and iv).
Condition DEG	Status	Regulation level	M0	M1	M2	M3	M4	M5	M6	M7	M8	M9	M10	M11	M12	M13	M14	M15	M16	M17	M18	M19	M20	M21	M22	M23	M24	M25	M26	M27	M28	M29	M30	M31	M32	M33
i) N+WR vs N+WW	Downregulated	TOTAL	0	8	13	3	60 (2)	3	2	21 (1)	19	3	6	0	1	2	0	2	2	2	1	0	8 (1)	15 (1)	5	11 (2)	0	9 (1)	2	1	2 (1)	3 (1)	0	1	0	1
		PAR	0	2	8 (1)	4	70 (4)	0	0	19 (6)	11	6	2	0	1	0	2	5 (3)	0	0	0	0	8	13 (2)	11 (2)	1	2	3	0	0	0	0	0	5	0	0
		TOTAL+PAR	0	3	10	3	240 (57)	0	1	43 (19)	20 (3)	5 (1)	1	0	0	1	0	5	0	0	0	0	21 (1)	39 (18)	29 (8)	1	0	6 (3)	0	6	0	1	0	2	0	0
	Upregulated	TOTAL	0	4	6	3	49	0	0	2	33 (5)	2	1	0	1	0	0	2	0	0	0	0	6 (1)	0	0	2	0	6	3 (1)	0	9 (4)	0	1	0	0	0
		PAR	0	228 (99)	11	9	63 (1)	0	0	0	22 (5)	14 (1)	2	0	0	3	3	6 (1)	0	0	0	0	18	3	3	0	2	6 (1)	0	0	5	1	1	0	1	2
		TOTAL+PAR	0	31 (1)	12	4	158 (20)	0	1	3	120 (42)	0	0	0	0	0	0	3 (1)	0	0	0	0	51 (23)	1	2 (1)	1	0	6 (3)	4 (1)	0	3 (2)	0	0	0	0	0
ii) N+WR vs NN+WR	Downregulated	TOTAL	0	5	1	1	82 (31)	1	1	16 (2)	6 (1)	2	2	0	5 (1)	0	1	6	1	0	0	0	1	0	0	9 (1)	0	0	0	0	0	0	0	0	0	0
		PAR	0	2	0	0	14 (5)	0	1	6 (1)	0	1	7	0	0	0	0	4 (1)	0	1	0	0	0	0	0	1	0	0	0	0	0	0	0	0	0	0
		TOTAL+PAR	0	1	0	1	126 (61)	0	1	35 (8)	2 (1)	0	8	0	0	0	0	12 (4)	0	0	0	0	0	0	0	4 (2)	0	0	0	0	0	0	0	0	1	0
	Upregulated	TOTAL	0	14 (1)	2	3	28 (4)	0	1	2 (1)	6	1	11	0	0	0	1	1	0	0	2	27 (11)	1 (1)	0	0	1	0	0	0	0	0	4	0	0	1	0
		PAR	0	2	0	0	14 (3)	0	0	1	3 (1)	0	5	0	1	0	0	2 (2)	0	0	0	7 (1)	0	0	0	0	1	0	0	0	0	0	0	0	1	0
		TOTAL+PAR	0	4	0	0	31 (9)	1	0	4	7 (1)	0	16	0	0	0	0	7	0	1	1	11 (4)	1	0	0	1 (1)	0	0	0	0	0	3	0	0	20 (6)	0
iii) NN+WR vs NN+WW	Downregulated	TOTAL	0	4	2	1	9	0	1	25 (2)	4	0	3	0	0	1	0	3	3 (1)	0	2	0	2	0	0	8 (2)	0	0	3	0	1	0	0	5	2	0
		PAR	0	0	2	0	4	0	0	15 (3)	2	0	1	0	0	0	0	0	0	0	3	1	0	0	0	1	2	1	0	1	0	0	0	1	0	0
		TOTAL+PAR	0	0	2	0	8	1	0	51 (10)	0	0	4	0	0	1	0	0	1	1	8	0	0	0	0	4 (1)	2	0	0	0	0	0	0	1	17 (6)	0
	Upregulated	TOTAL	0	3	1	1	6	0	0	7	3	1	6	0	0	0	0	3	3	12	23 (8)	0	0	0	1	3	16 (1)	0	0	0	0	0	0	0	1	0
		PAR	0	6	1	0	2	1	0	1	7	0	3	0	0	0	0	0	0	2 (1)	5 (2)	0	2	0	0	1	3	0	0	0	0	0	0	0	0	0
		TOTAL+PAR	0	1	0	0	2	0	0	3	2	0	3	0	0	0	0	0	0	8 (1)	16 (8)	0	0	0	0	3 (2)	17 (9)	0	0	0	0	0	0	0	1	0
iv) N+WW vs NN+WW	Downregulated	TOTAL	0	5	4	4	7	1	3	12 (4)	6 (1)	1	9	0	0	3	0	1	2	0	2	0	3 (1)	4	0	4 (1)	2	2	1	0	13 (4)	2	0	0	0	0
		PAR	0	4	9 (1)	5	0	2	0	17 (1)	1	0	5	0	0	10 (1)	0	0	3	0	0	0	2	3	1	7 (2)	0	0	1	0	6 (1)	0	0	0	0	0
		TOTAL+PAR	0	3	11	8	4	0	1	28 (10)	4 (1)	0	4	0	0	16 (1)	0	3	3	0	3	0	2	1	0	2 (1)	0	0	0	0	12 (3)	4 (2)	0	0	0	0
	Upregulated	TOTAL	0	6	7	0	6	7	2	5	2	0	19	0	1	4	0	7	2	0	6	8	1	22 (1)	7 (1)	1	4	3	0	0	3	10 (4)	0	0	0	0
		PAR	0	1	3	3	1	1	0	2	0	0	19	1	0	2	0	0	4	2	3	5	0	8 (2)	2	1	2	0	0	0	0	0	0	0	0	0
		TOTAL+PAR	0	1	9	4	0	2	1	7	0	1	52	0	0	2	0	0	4	0	0	2	0	53 (19)	2	3 (1)	1	1	0	0	6 (2)	1	0	0	0	0
All 34 modules (M) are depicted. The four different contrasts (i, ii, iii, and iv) in which the DEG condition was assessed are shown, as well as the status (up- or down-regulated) and the regulation level (TOTAL, PAR, or TOTAL+PAR). The number of DEGs that are also modules’ hub genes is indicated in parentheses.

## Sheet: Suppl.Table_4
Table S4. Putative targets of selected candidate transcription factors’ description.
Transcription Factor					Putative Target
GlymaID (version 4)	Entrez ID	Description	Co-Expression Module	Regulation Level	GlymaID (version 4)	Entrez ID	Description	Co-Expression Module	Regulation Level	Network Connection
Glyma_04G039300	100819313	bZIP transcription factor TRAB1	M4	TOTAL + PAR	Glyma_02G104300	100815146	abscisate beta-glucosyltransferase	M8	TOTAL+PAR	No
					Glyma_02G143100	100781835	uncharacterized LOC100781835	M4	TOTAL+PAR	No
					Glyma_02G145100	100787694	sulfate transporter 3.1	M4	TOTAL+PAR	Yes
					Glyma_03G088800	100785773	serine/threonine-protein kinase OXI1	M4	TOTAL+PAR	No
					Glyma_03G133400	100797053	uncharacterized LOC100797053	M1	TOTAL	No
					Glyma_03G137900	100807861	probable galactinol--sucrose galactosyltransferase 2	M4	TOTAL+PAR	Yes
					Glyma_03G158700	100810013	auxin-induced protein AUX28	M8	TOTAL+PAR	No
					Glyma_03G189100	100806269	probable glycosyltransferase At5g03795	M4	TOTAL	No
					Glyma_05G101300	100811309	auxin-responsive protein GH3	M8	TOTAL+PAR	No
					Glyma_05G104300	100306663	uncharacterized protein At2g23090	M1	TOTAL+PAR	No
					Glyma_05G191500	102660360	uncharacterized LOC102660360	M4	TOTAL+PAR	No
					Glyma_06G021200	100808125	probable nucleoredoxin 2	M4	TOTAL+PAR	Yes
					Glyma_06G136500	100803327	ribosome-binding factor PSRP1, chloroplastic	M4	TOTAL+PAR	No
					Glyma_06G183000	100808291	CASP-like protein 4A3	M4	TOTAL+PAR	No
					Glyma_06G248900	732639	NAC domain protein NAC3	M4	TOTAL+PAR	Yes
					Glyma_07G126800	100778184	zinc finger CCCH domain-containing protein 20	M4	TOTAL+PAR	No
					Glyma_08G086600	100816354	ATP-dependent zinc metalloprotease FTSH 2, chloroplastic-like	M8	TOTAL+PAR	No
					Glyma_08G246400	100820446	ninja-family protein AFP3	M4	TOTAL+PAR	No
					Glyma_08G303800	100799631	polyamine oxidase 2	M4	TOTAL	Yes
					Glyma_09G010700	100790349	tonoplast dicarboxylate transporter	M8	TOTAL	No
					Glyma_09G066700	100791216	cleavage factor CFIM-25-like protein	M20	TOTAL+PAR	No
					Glyma_09G082900	100775567	UDP-glycosyltransferase 43	M8	TOTAL+PAR	No
					Glyma_09G254400	100796481	probable WRKY transcription factor 43	M4	TOTAL+PAR	No
					Glyma_10G147000	100786114	homeobox protein knotted-1-like 10	M4	TOTAL	No
					Glyma_10G151000	100306373	hypothetical protein	M4	TOTAL+PAR	Yes
					Glyma_10G174100	100813932	NDR1/HIN1-like protein 6	M8	TOTAL+PAR	No
					Glyma_10G205600	100792991	ABC transporter G family member 21	M4	TOTAL+PAR	Yes
					Glyma_10G221000	100799000	type IV inositol polyphosphate 5-phosphatase 3	M4	TOTAL	No
					Glyma_10G242100	100818887	xyloglucan galactosyltransferase XLT2	M8	TOTAL+PAR	No
					Glyma_11G091400	547973	heavy metal-associated isoprenylated plant protein 26	M4	TOTAL	No
					Glyma_11G149900	100306232	uncharacterized LOC100306232	M4	TOTAL+PAR	No
					Glyma_11G150300	100306647	dirigent domain-containing protein	M8	TOTAL+PAR	No
					Glyma_11G243400	100527069	RING/U-box superfamily protein	M4	TOTAL+PAR	No
					Glyma_12G030600	100789013	PI-PLC X-box domain-containing protein DDB_G0293730	M20	TOTAL+PAR	No
					Glyma_12G047500	100217336	cold-regulated protein	M8	TOTAL+PAR	Yes
					Glyma_12G072100	100798336	tetraspanin-3	M8	TOTAL	No
					Glyma_12G181500	100796036	uncharacterized protein At4g22758	M4	TOTAL+PAR	No
					Glyma_12G221500	732651	NAC domain protein NAC4	M20	TOTAL	No
					Glyma_13G010100	100802266	long chain acyl-CoA synthetase 8	M8	TOTAL	Yes
					Glyma_13G036600	100788845	F-box protein SKP2B	M4	TOTAL+PAR	Yes
					Glyma_13G071800	100797842	cysteine proteinase inhibitor	M1	TOTAL+PAR	No
					Glyma_13G106800	100789207	protein phosphatase 2C 77	M20	TOTAL+PAR	No
					Glyma_13G279900	100170718	NAC transcription factor NAC27	M4	TOTAL+PAR	Yes
					Glyma_14G152700	100170714	NAC domain-containing protein	M8	TOTAL+PAR	Yes
					Glyma_15G157700	100792939	eEF1A lysine and N-terminal methyltransferase	M4	TOTAL	No
					Glyma_16G043200	100170708	NAC domain protein	M4	TOTAL+PAR	No
					Glyma_16G145300	100796815	serine carboxypeptidase-like 27	M8	TOTAL+PAR	No
					Glyma_16G211700	100170690	kunitz family trypsin and protease inhibitor protein	M8	TOTAL+PAR	No
					Glyma_16G219500	100786750	chalcone reductase CHR2	M8	TOTAL+PAR	No
					Glyma_17G048300	100797385	uncharacterized LOC100797385	M20	TOTAL+PAR	No
					Glyma_17G150100	547683	beta-amylase	M8	TOTAL+PAR	No
					Glyma_17G234900	100794731	uncharacterized LOC100794731	M1	TOTAL+PAR	No
					Glyma_18G035000	100796161	protein phosphatase 2C 37	M4	TOTAL+PAR	Yes
					Glyma_18G040100	732557	dehydroascorbate reductase	M4	TOTAL+PAR	No
					Glyma_18G040700	100794413	transcription factor MYB20	M20	TOTAL+PAR	No
					Glyma_18G040900	100795999	nudix hydrolase 18, mitochondrial	M20	TOTAL+PAR	No
					Glyma_19G025200	100795128	mogroside IE synthase	M4	TOTAL+PAR	Yes
					Glyma_19G095400	100801859	ACT domain-containing protein ACR6	M20	TOTAL+PAR	No
					Glyma_19G135200	100305533	uncharacterized LOC100305533	M1	TOTAL+PAR	No
					Glyma_19G160600	100796711	uncharacterized LOC100796711	M4	TOTAL+PAR	No
					Glyma_19G201900	100794951	uncharacterized LOC100794951	M20	TOTAL+PAR	No
					Glyma_19G232000	100812717	epoxide hydrolase A	M20	TOTAL+PAR	No
					Glyma_20G184900	100783696	ABC transporter G family member 21	M4	TOTAL	Yes
					Glyma_20G237200	100500140	auxin-repressed superfamily protein	M4	TOTAL+PAR	No
Glyma_13G279900	100170718	NAC27	M4	TOTAL + PAR	Glyma_02G143100	100781835	uncharacterized LOC100781835	M4	TOTAL+PAR	No
					Glyma_05G230200	100775481	probable protein ABIL5	M4	TOTAL	No
					Glyma_06G239500	100792386	anthocyanidin 3-O-glucosyltransferase 5	M8	TOTAL+PAR	No
					Glyma_07G073500	100790647	uncharacterized LOC100790647	M4	TOTAL	No
					Glyma_08G182500	100787839	WAT1-related protein At1g68170	M4	TOTAL	No
					Glyma_08G316000	100527564	uncharacterized LOC100527564	M4	TOTAL+PAR	No
					Glyma_09G254400	100796481	probable WRKY transcription factor 43	M4	TOTAL+PAR	No
					Glyma_10G147000	100786114	homeobox protein knotted-1-like 10	M4	TOTAL	No
					Glyma_11G117400	100305467	putative glycine-rich RNA binding protein	M4	TOTAL	No
					Glyma_12G234800	100305754	kunitz family trypsin and protease inhibitor protein	M8	TOTAL	No
					Glyma_13G196500	100305482	NADPH:quinone oxidoreductase	M20	TOTAL+PAR	No
					Glyma_13G258300	102670394	uncharacterized LOC102670394	M4	TOTAL+PAR	No
					Glyma_16G011400	100787124	dormancy-associated protein homolog 3	M4	TOTAL+PAR	No
					Glyma_17G069500	100306600	uncharacterized LOC100306600	M4	TOTAL+PAR	No
					Glyma_18G116300	100785056	polyamine oxidase 2	M4	TOTAL	Yes
					Glyma_19G201900	100794951	uncharacterized LOC100794951	M20	TOTAL+PAR	No
Glyma_16G021000	100811208	homeobox-leucine zipper protein ATHB-12	M4	TOTAL + PAR	Glyma_01G083700	100819403	aluminum-activated malate transporter family protein	M4	TOTAL+PAR	Yes
					Glyma_02G145100	100787694	sulfate transporter 3.1	M4	TOTAL+PAR	Yes
					Glyma_05G215600	100815232	putative GABA transporter	M4	TOTAL+PAR	No
					Glyma_06G106700	100805807	uncharacterized LOC100805807	M4	TOTAL+PAR	Yes
					Glyma_06G307900	100795709	cellulose synthase-like protein H1	M4	TOTAL+PAR	No
					Glyma_10G221000	100799000	type IV inositol polyphosphate 5-phosphatase 3	M4	TOTAL	Yes
					Glyma_13G090600	100306116	uncharacterized LOC100306116	M4	TOTAL+PAR	No
					Glyma_13G108600	100306717	uncharacterized LOC100306717	M1	TOTAL+PAR	No
					Glyma_15G118800	100778034	nuclear transcription factor Y subunit B-3	M4	TOTAL	No
					Glyma_16G055100	100820286	uncharacterized LOC100820286	M4	TOTAL+PAR	No
					Glyma_16G200900	100779813	carboxylesterase 1	M8	TOTAL	No
Glyma_16G043200	100170708	NAC12	M4	TOTAL + PAR	Glyma_01G214600	732541	senescence-inducible chloroplast stay-green protein 2	M8	TOTAL+PAR	No
					Glyma_02G145100	100787694	sulfate transporter 3.1	M4	TOTAL+PAR	No
					Glyma_05G191500	102660360	uncharacterized LOC102660360	M4	TOTAL+PAR	No
					Glyma_05G227100	100782634	probable protein phosphatase 2C 6	M4	TOTAL+PAR	Yes
					Glyma_08G182500	100787839	WAT1-related protein At1g68170	M4	TOTAL	No
					Glyma_08G230100	547541	SRPBCC domain-containing protein	M8	TOTAL+PAR	No
					Glyma_08G316000	100527564	uncharacterized LOC100527564	M4	TOTAL+PAR	No
					Glyma_09G254400	100796481	probable WRKY transcription factor 43	M4	TOTAL+PAR	No
					Glyma_10G147000	100786114	homeobox protein knotted-1-like 10	M4	TOTAL	No
					Glyma_10G203200	100799342	copper transport protein ATX1	M1	TOTAL+PAR	No
					Glyma_13G130700	100804386	uncharacterized LOC100804386	M1	TOTAL+PAR	No
					Glyma_13G196500	100305482	NADPH:quinone oxidoreductase	M20	TOTAL+PAR	No
					Glyma_16G011400	100787124	dormancy-associated protein homolog 3	M4	TOTAL+PAR	No
					Glyma_17G069500	100306600	uncharacterized LOC100306600	M4	TOTAL+PAR	No
					Glyma_19G201900	100794951	uncharacterized LOC100794951	M20	TOTAL+PAR	No
					Glyma_19G207100	100777428	zinc finger protein CONSTANS-LIKE 13-like	M8	TOTAL+PAR	No
Glyma_14G152700	100170714	NAC21	M8	TOTAL + PAR	Glyma_03G133400	100797053	uncharacterized LOC100797053	M1	TOTAL	No
					Glyma_05G230200	100775481	probable protein ABIL5	M4	TOTAL	No
					Glyma_06G007500	548071	arginine decarboxylase	M4	TOTAL+PAR	No
					Glyma_06G183000	100808291	CASP-like protein 4A3	M4	TOTAL+PAR	No
					Glyma_07G038800	100818105	germin-like protein	M8	TOTAL+PAR	No
					Glyma_09G029100	100820136	probable folate-biopterin transporter 7	M8	TOTAL	No
					Glyma_09G196000	100811237	3-hydroxy-3-methylglutaryl coenzyme A reductase 2-B	M4	TOTAL+PAR	No
					Glyma_09G254400	100796481	probable WRKY transcription factor 43	M4	TOTAL+PAR	No
					Glyma_12G047500	100217336	cold-regulated protein	M8	TOTAL+PAR	No
					Glyma_13G196500	100305482	NADPH:quinone oxidoreductase	M20	TOTAL+PAR	No
					Glyma_13G245600	100794998	uncharacterized LOC100794998	M4	TOTAL	No
					Glyma_17G095000	100799646	transcription factor bHLH79	M4	TOTAL+PAR	No
					Glyma_18G116300	100785056	polyamine oxidase 2	M4	TOTAL	No
					Glyma_19G025200	100795128	mogroside IE synthase	M4	TOTAL+PAR	No
Transcription factors were selected for being up-regulated at the translational level (TOTAL+PAR or PAR) in the contrast i) N+WR vs N+WW and for their putative targets being up-regulated at the transcriptional level (TOTAL or TOTAL+PAR). This follows the natural molecular function of transcriptional regulation in which one would expect the putative target to have higher transcripts (TOTAL) after …

## Sheet: Suppl.Table_5
Table S5. 5’-TOP THHYYYYYTYCTCTYTYTYTYTCTYYNTY motif enrichment analysis in contrast i (N+WR vs N+WW).
Contrast	Comparison		Enrichment Ratio	E-value
i) N+WR vs N+WW	A:	Up-PAR	35,95	5,34 x 10-11
		vs
		Not Up-PAR
	B:	Up-PAR	1,04	0,28
		vs
		Up-TOTAL
	C:	M1 Up-PAR	1,73	1,31 x 10-7
		vs
		Not Up-PAR
	D:	M1 Up-PAR	1,44	4,19 x 10-3
		vs
		Up-TOTAL
M1: Gene co-expression Module 1. PAR: Polysome-Associated mRNA fraction. TOTAL: total RNA fraction. Not Up-PAR: non-translational-up-regulated genes, i.e., stable genes, down-regulated genes at the translational level, or down- or up-regulated genes at the transcriptional level. Comparisons having strong evidence against the null hypothesis (E-values < 0.01) are shown under bold text.
