# Supplementary figures and images for: Genes associated with translation and oxidative phosphorylation as components of the translational response in nodulated and water-restricted soybean
Source: Research Square preprint supplement (doi:10.21203/rs.3.rs-7686372/v1), 2025-10-13

## GO: Biological Process

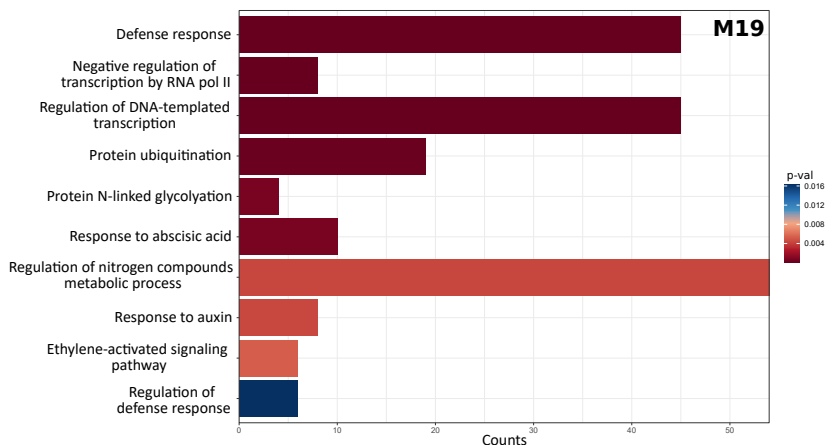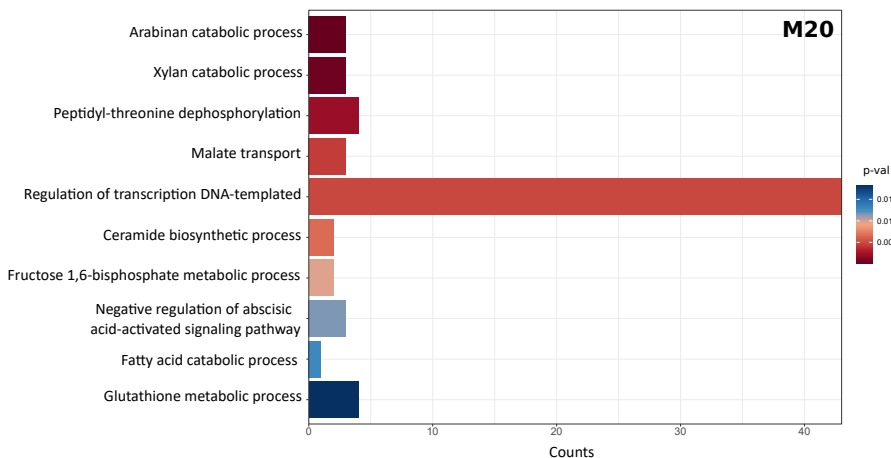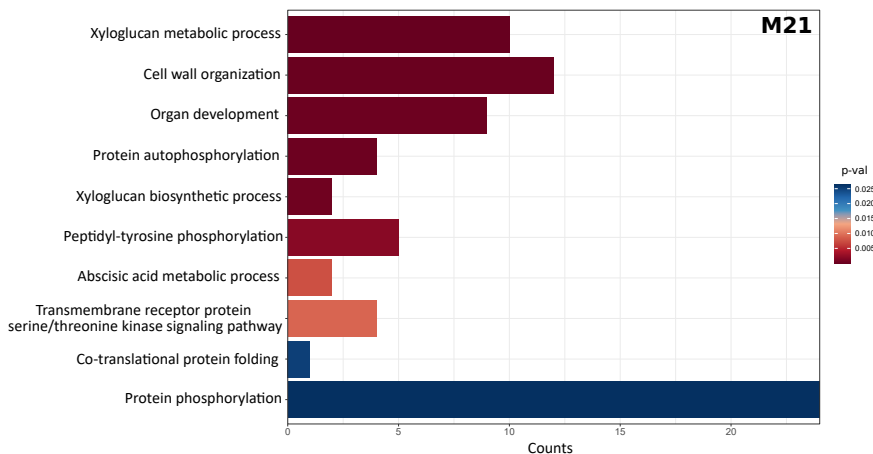

Supplement: Supplementary file 1 [file 7babac0fee23fe9c8337010c.pdf]

A

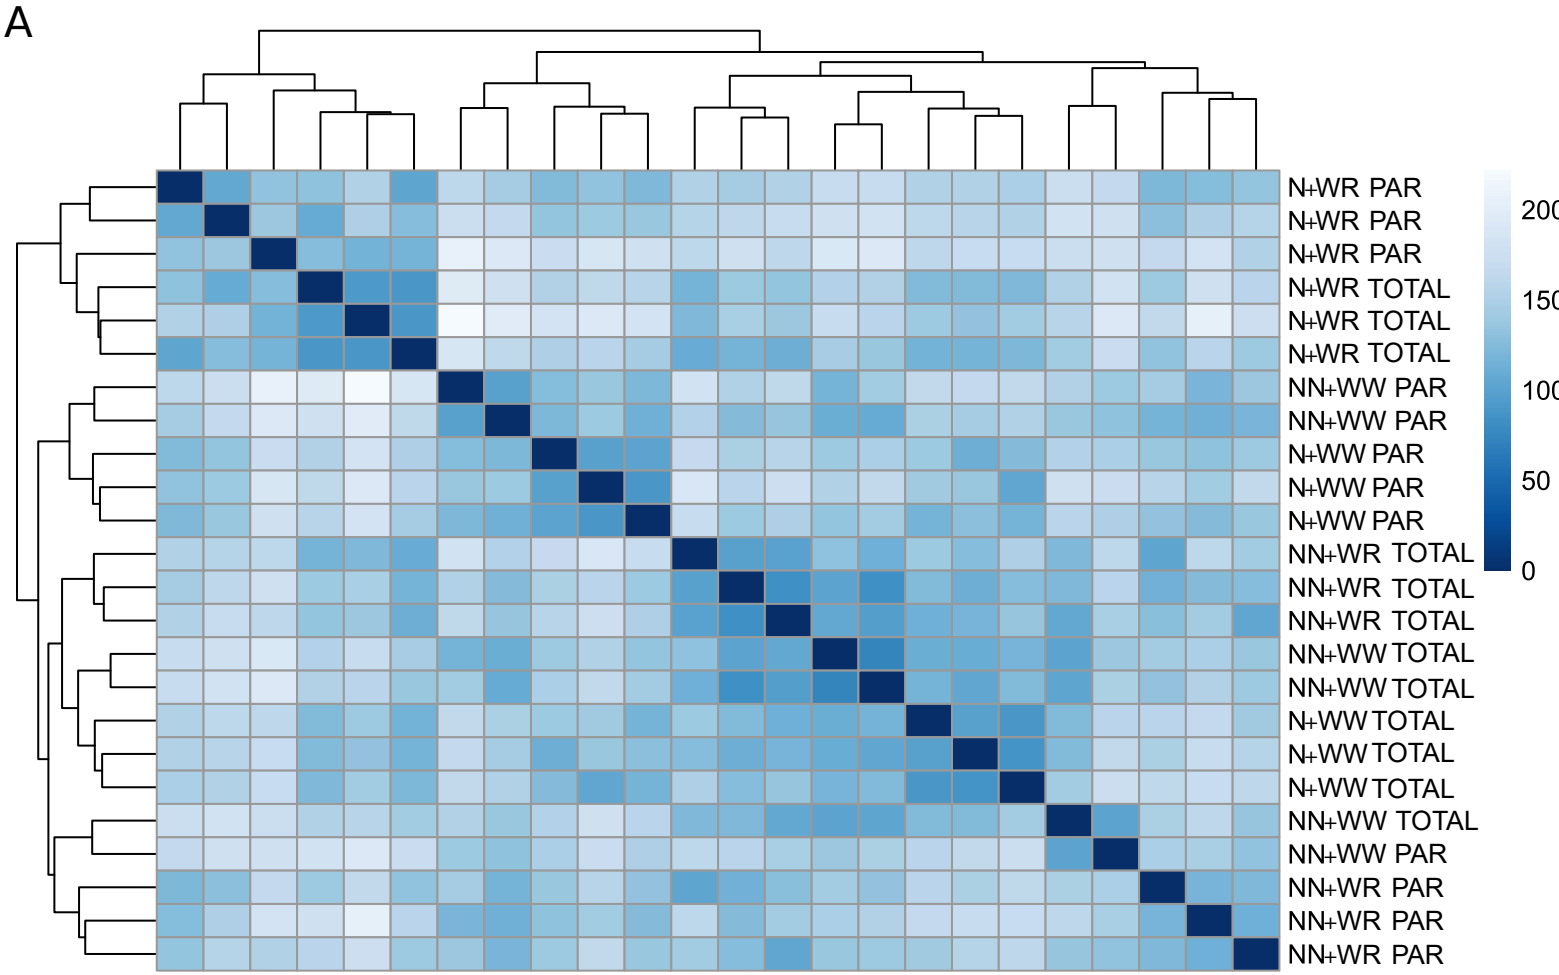

B

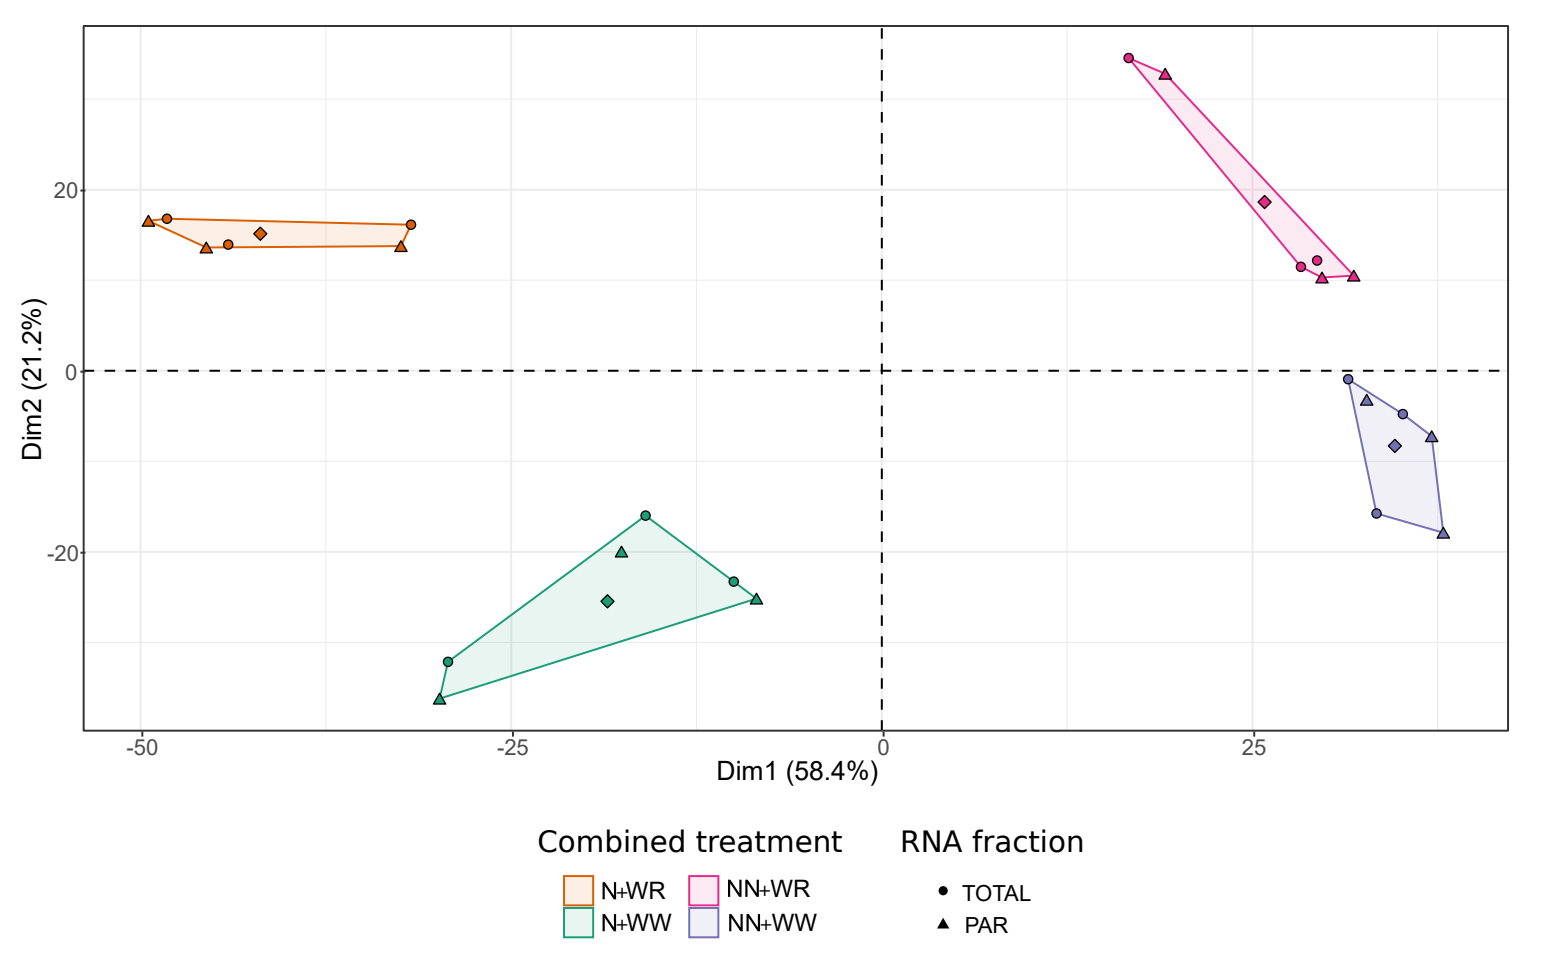

Supplement: Supplementary file 2 [file 94be88741880c143a689abe9.pdf]
